# Supplementary material for: Influence of Aquatic Therapy in Children and Youth with Cerebral Palsy: A Qualitative Case Study in a Special Education School
Source: Int J Environ Res Public Health. 2020 May 23;17(10):3690. doi: 10.3390/ijerph17103690 (PMC7277651; doi:10.3390/ijerph17103690)
Supplement: Supplementary file 1 [file ijerph-17-03690-s001.pdf]

**Supplemental material S1.** Semi-structured interview guide questions for children

| Research areas                                                                 | Questions                                                                    |
|--------------------------------------------------------------------------------|------------------------------------------------------------------------------|
| Meaning of aquatic therapy and overall experience                              | How has your experience been with the aquatic therapy program at the school? |
| Aquatic therapy treatment                                                      | What do you feel is most important in this treatment?                        |
| Influence of aquatic therapy on function, structures, activity & participation | How is your body after being in the water? How is your movement?             |
| Factors for which aquatic therapy is most useful                               | What do you like the most about doing therapy in water?                      |

**Supplemental material S2.** Focus group guide questions for parents

| <b>Research areas</b>                                                      | <b>Questions</b>                                                                                                                              |
|----------------------------------------------------------------------------|-----------------------------------------------------------------------------------------------------------------------------------------------|
| Meaning of aquatic therapy and prior experiences                           | What does it mean to you that your child receives aquatic therapy sessions at school?                                                         |
| Aquatic therapy treatment                                                  | What do you consider has been the most relevant aspect of this treatment?                                                                     |
| Influence of aquatic therapy on the daily care and management of the child | How is your child the day he/she goes to the pool?                                                                                            |
| Factors for which aquatic therapy is most useful                           | How do you think aquatic therapy helps to improve your child's health?<br>What do you think aquatic therapy can provide you in the long term? |

**Supplemental material S3.** Semi-structured interview guide questions for professionals

| <b>Research areas</b>                                                                | <b>Questions</b>                                                                       |
|--------------------------------------------------------------------------------------|----------------------------------------------------------------------------------------|
| Meaning of aquatic therapy and prior experiences                                     | What do you think of aquatic therapy as an intervention within the school?             |
| Aquatic therapy treatment                                                            | What do you consider has been the most relevant aspect of this treatment?              |
| Influence of aquatic therapy on the daily care and management of the child in school | What feelings does the child convey the day that you know he/she has been in the pool? |
| Factors for which aquatic therapy is most useful                                     | What do you think aquatic therapy brings to his/her life?                              |
|                                                                                      | How do you feel aquatic therapy can affect him/her in the long term?                   |
